# Supplementary material for: The origin and structural evolution of de novo genes in Drosophila
Source: PubMed Central journal article supplement (PMC10821953; doi:10.1038/s41467-024-45028-1), 2024-01-27
Supplement: 41467_2024_45028_MOESM1_ESM.pdf [file 41467_2024_45028_MOESM1_ESM.pdf]

Supplementary figures for  
**The origin and structural evolution of *de novo* genes in *Drosophila***

Junhui Peng, Li Zhao  
 Laboratory of Evolutionary Genetics and Genomics, The Rockefeller University, New  
 York, NY 10065, USA

\*Correspondence to: [lzhao@rockefeller.edu](mailto:lzhao@rockefeller.edu)

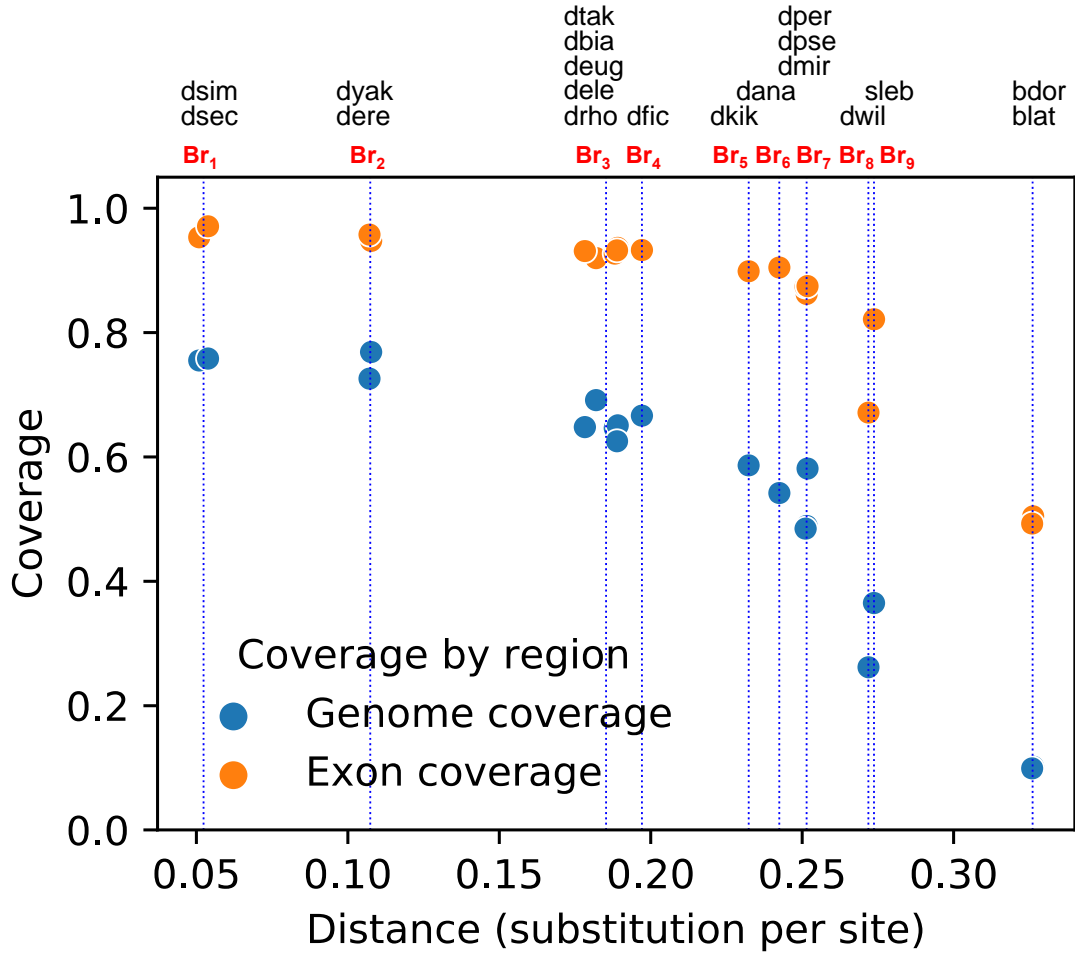

Figure S1. Statistics of progressive cactus alignments.

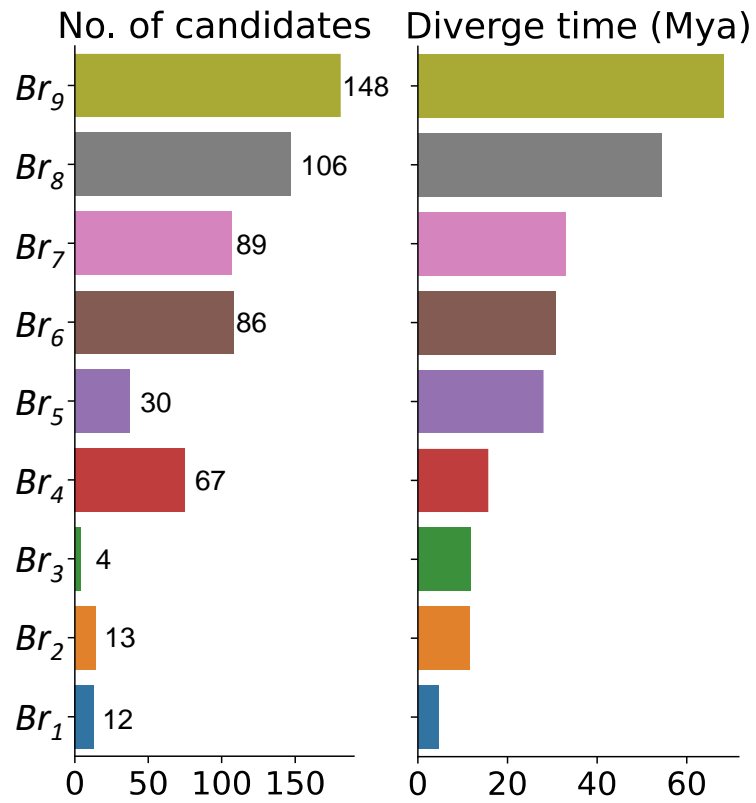

Figure S2. Number of *de novo* gene candidates identified in each branch. The number generally correlated with the divergence time between *D. melanogaster* and each branch.

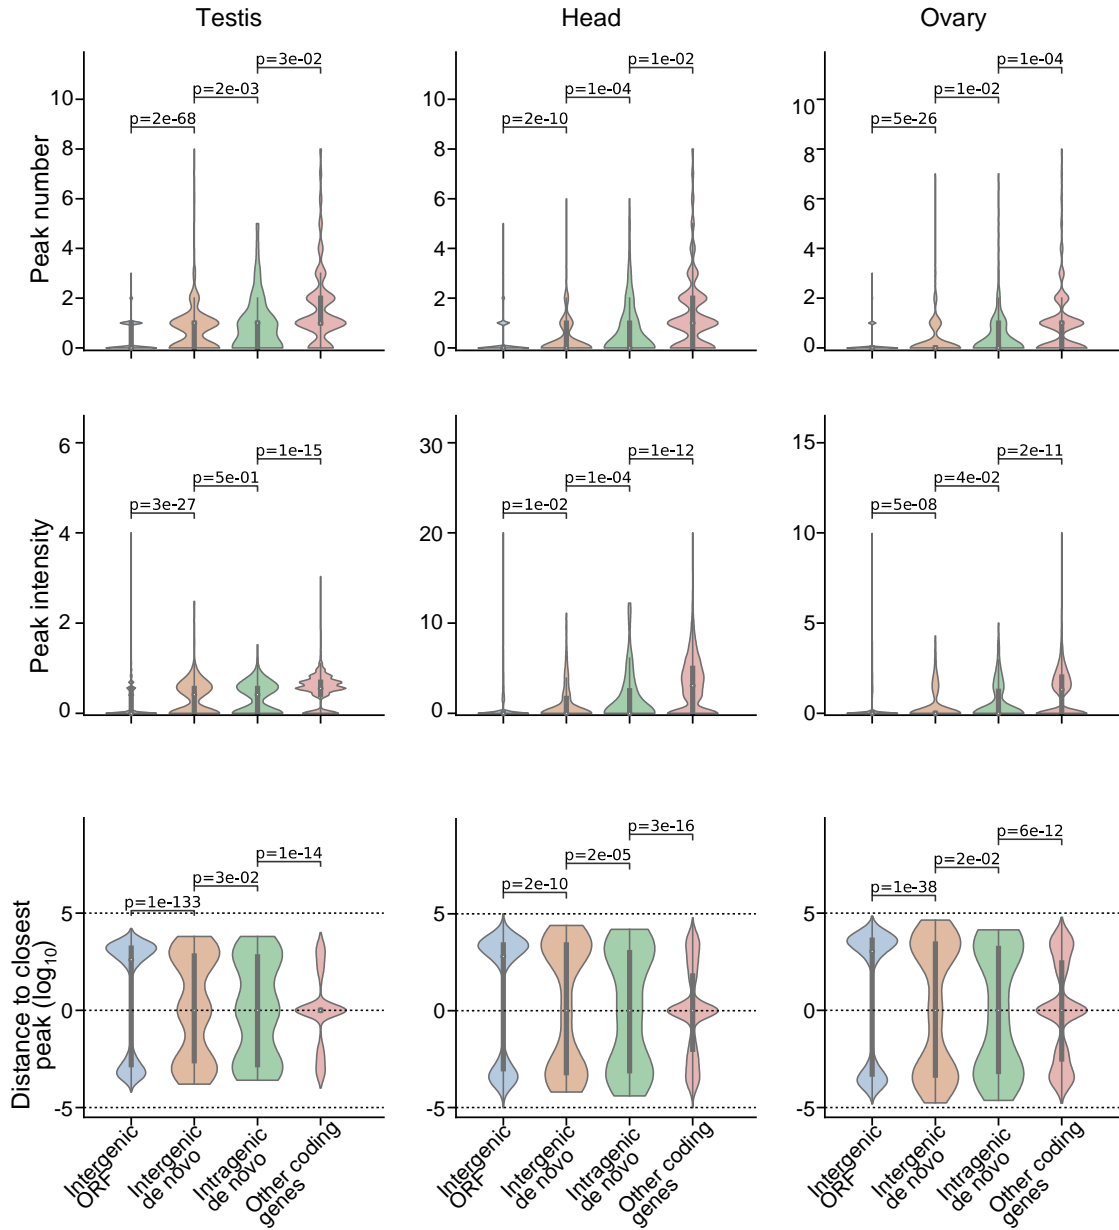

Figure S3. ATAC-seq peaks, intensities, and distances for de novo gene candidates in testis, head, and ovary.

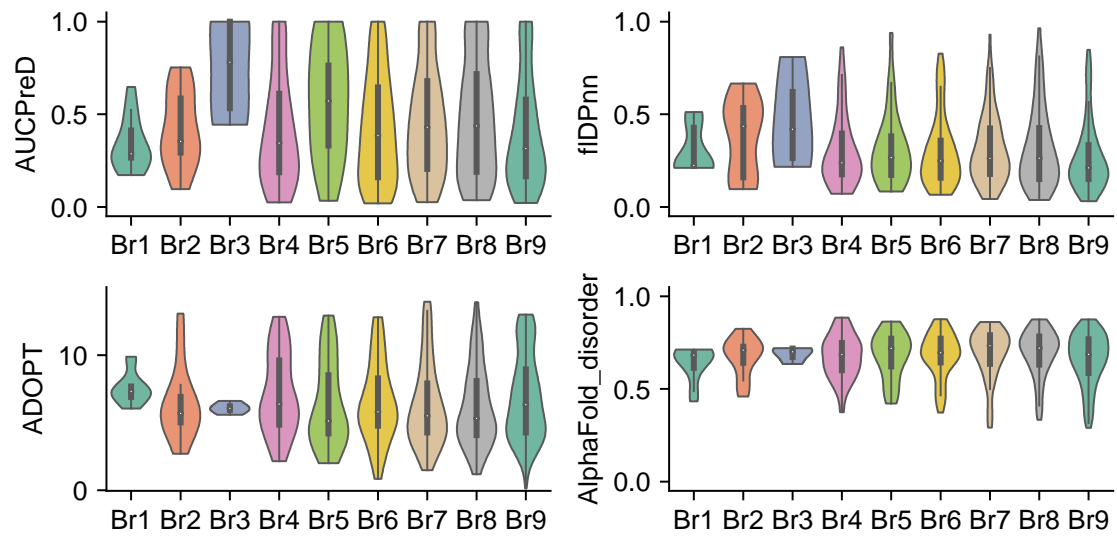

Figure S4. Structural disorder of *de novo* proteins by different state-of-the-art predictors, including AUCPreD (top left panel), fIDPnn (top right panel), ADOPT (bottom left panel), and AlphaFold\_disorder (bottom right panel). The results overall indicated that the structural disorder of *de novo* proteins changed little with their origin ages.

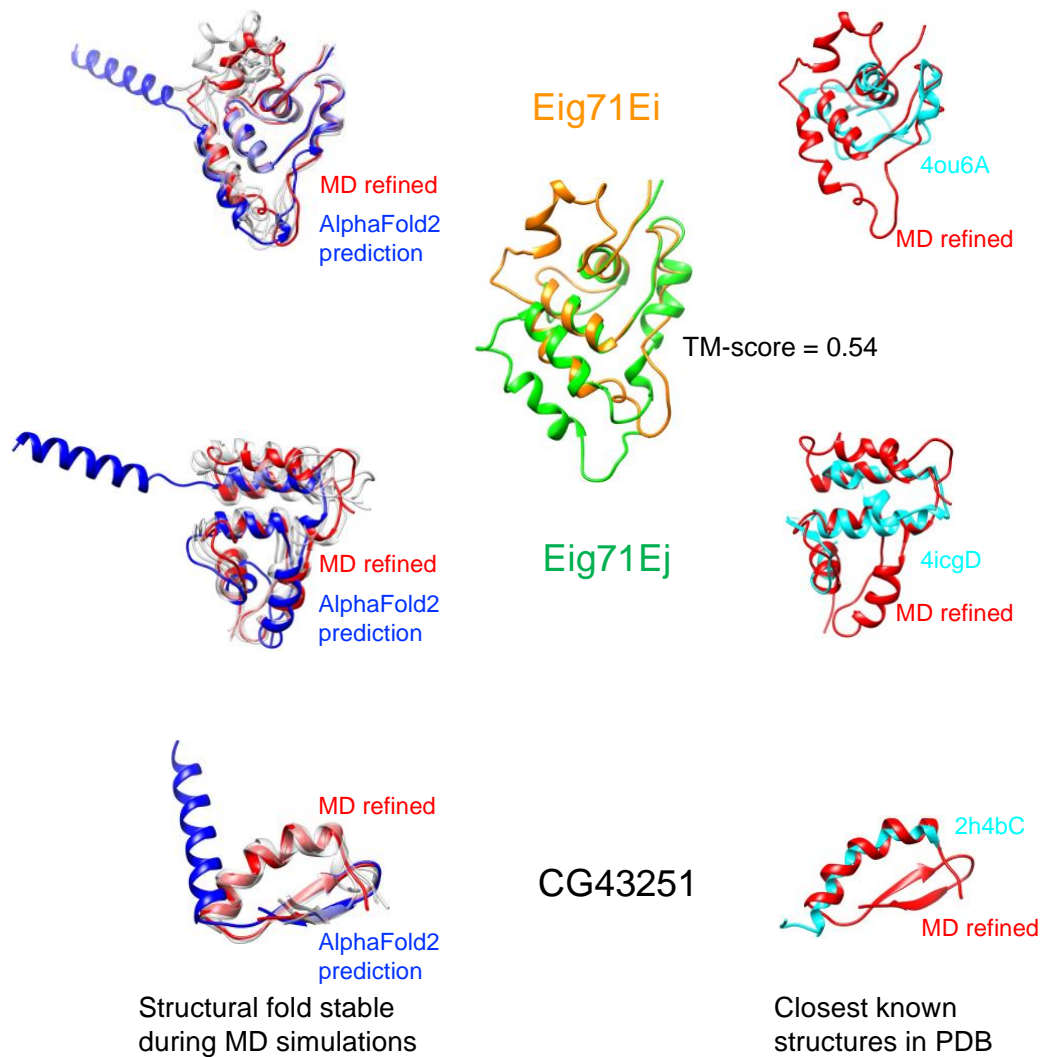

Figure S5. Eig71Ei, Eig71Ej, and CG43251 might adopt new structural folds. Left panel: Eig71Ei, Eig71Ej, and CG43251 remained similar structural folds during MD simulations. Right panel: the structures in PDB with the largest TM-scores to Eig71Ei, Eig71Ej, and CG43251 were superimposed to their MD refined structural models. All the three largest TM-scores were smaller than 0.5 (Table S1). Eig71Ei and Eig71Ej are paralogs and share similar structural folds with TM-score of 0.54 (inserted panel).

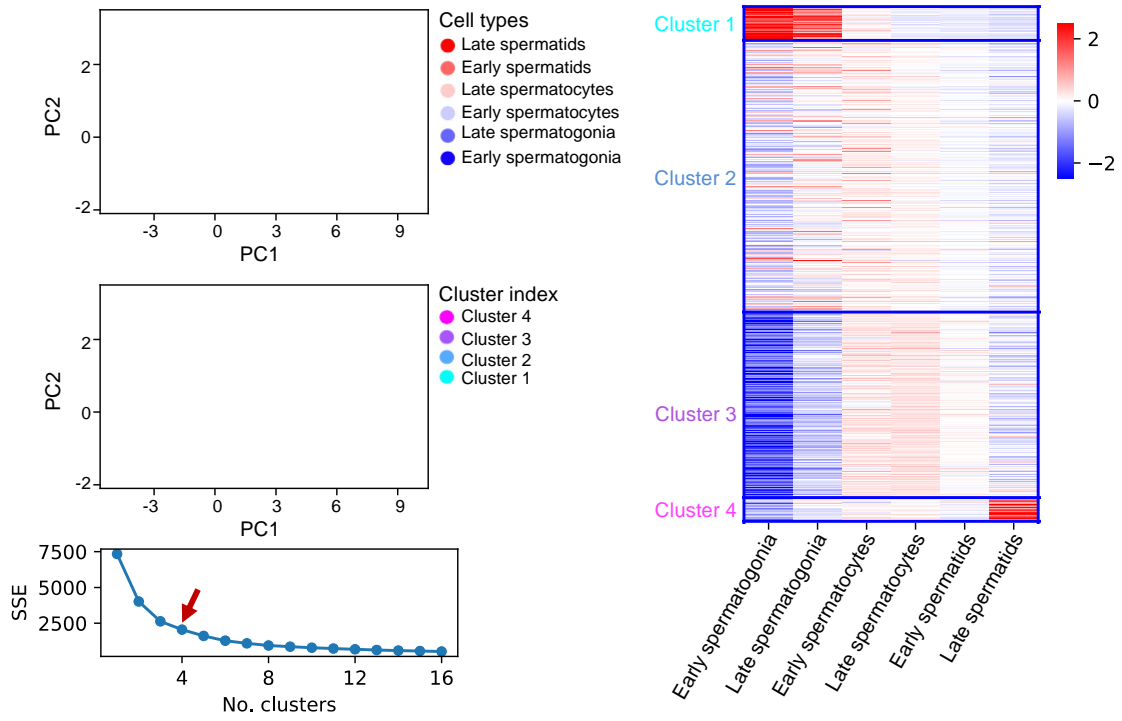

Figure S6. Clustering of all *D. melanogaster* testis-biased genes. The sum of squared error (SSE) as a function of the number of clusters was shown in the bottom left panel.

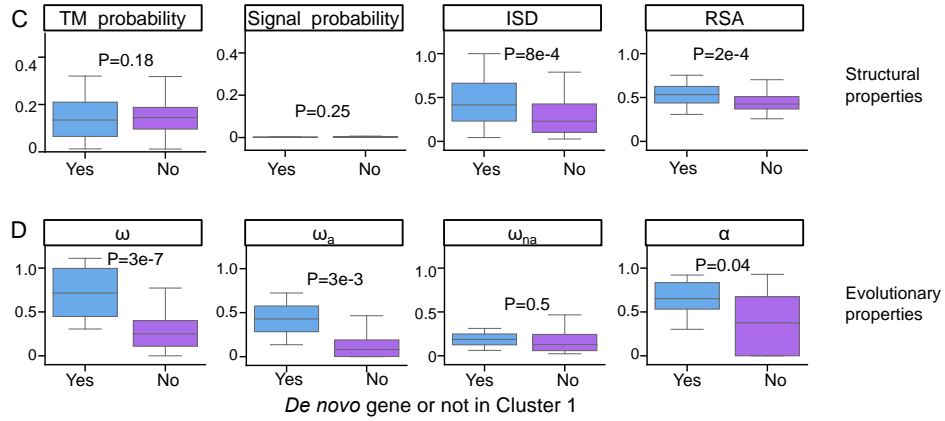

Figure S7. Comparison of testis-biased *de novo* genes (cyan) and non-*de novo* genes (purple) in cluster #1. For clustering analysis, see Figure 5 for detail. In cluster #1, testis biased *de novo* genes are more disordered (ISD panel) and exposed (RSA panel). These *de novo* genes also evolve faster ( $\omega$  panel) with higher adaptation rates ( $\omega_a$  panel).

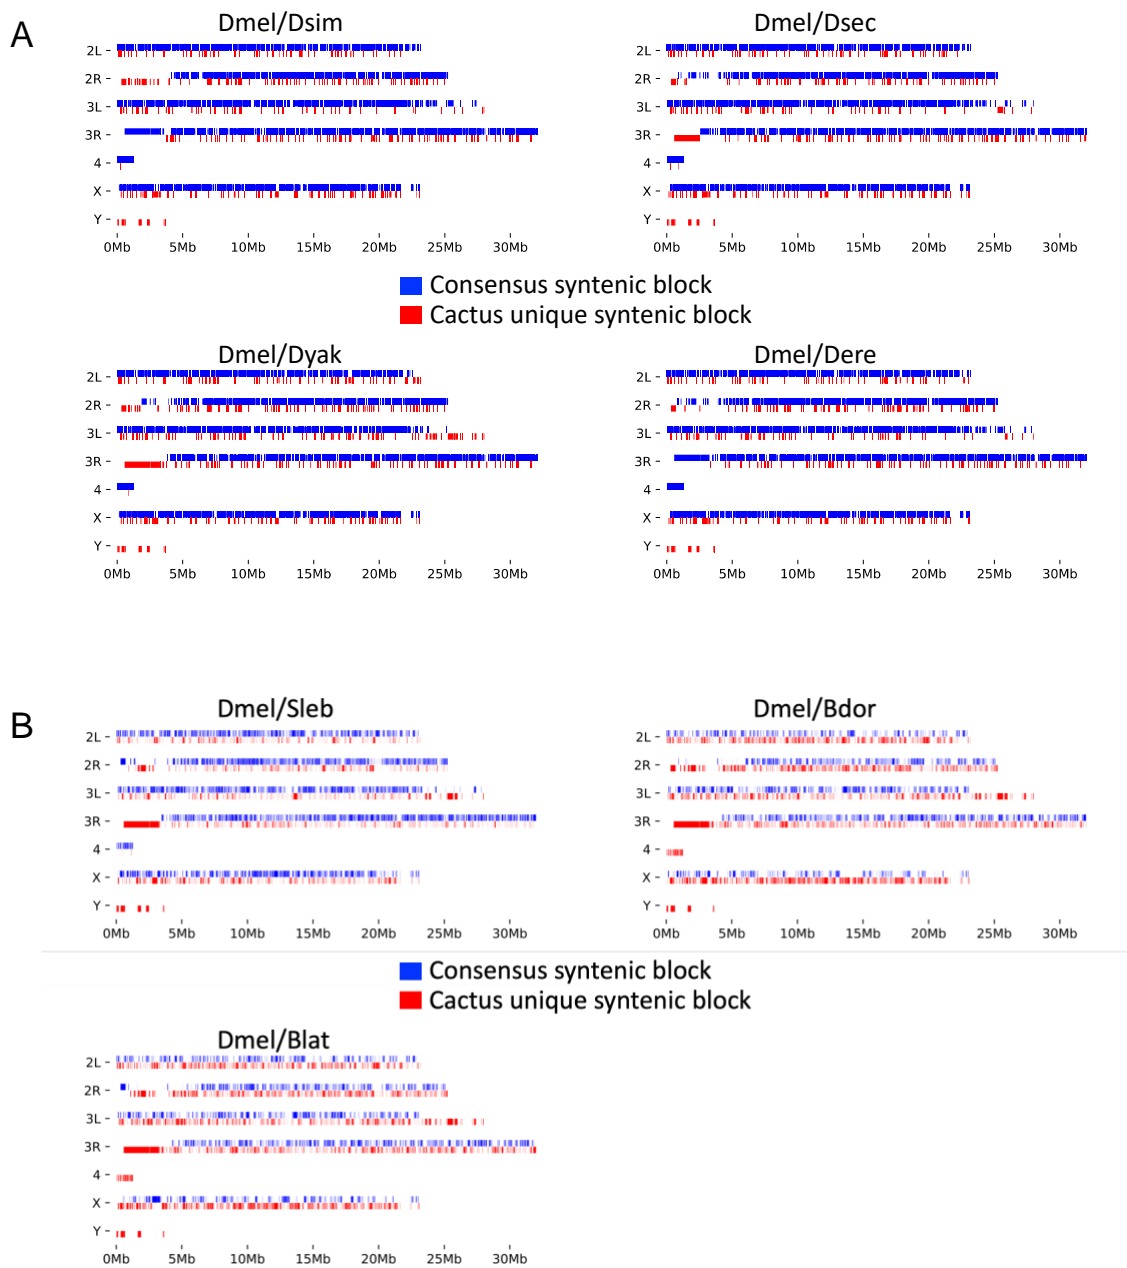

Figure S8. Comparison of synteny blocks recovered by cactus aligner and micro-synteny method in (A) four closely related genomes (*D. simulans*, *D. sechellia*, *D. yakuba*, and *D. erecta*), and (B) three distantly related genomes (*S. lebanonensis*, *B. dorsalis*, and *B. latifrons*). The figure shows that Cactus aligner recover more syntenic regions.



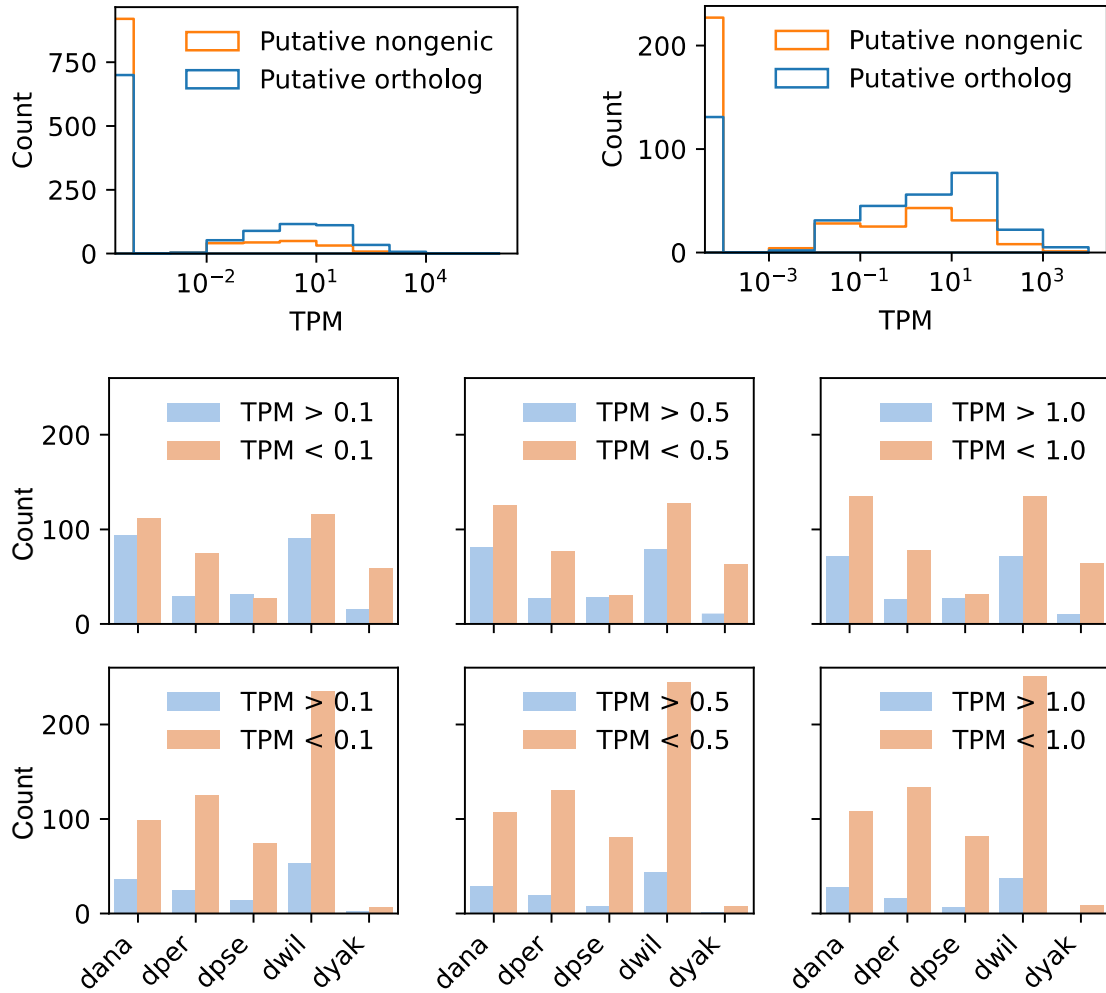

Figure S9. RNA-seq support of the unannotated putative orthologs of some de novo gene candidates in *D. yakuba*, *D. ananassae*, *D. persimilis*, *D. pseudoobscura*, *D. willistoni*.

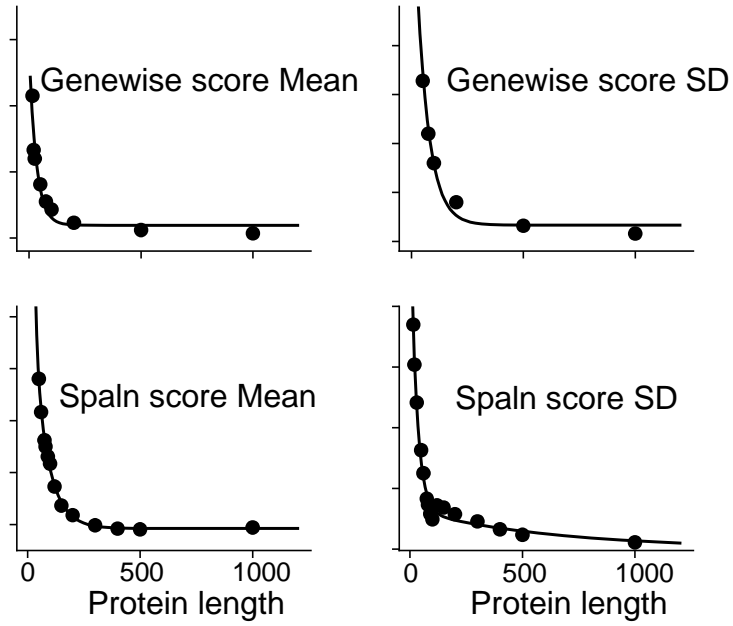

Figure S10. Random simulations of Genewise/Spaln. We used two-phase decay function to fit the mean (left panel) and standard error (right panel) of spliced align score (Genewise, top panel, and Spaln, bottom panel).

Table S1. Proportions of optimal codons in *de novo* genes and other annotated protein-coding genes in *D. melanogaster*. The median values of the proportions were listed in the P(optimal, *de novo*) and P(optimal, other) columns. *De novo* genes show significantly less optimal codon usage compared to other annotated protein-coding genes. The P-values were computed using *scipy.stats.ttest\_ind* module with the option one-sided test, *alternative="less"*, and were shown in the P(t-test) column. Most amino acids show a significant positive correlation between the proportion of optimal codons and the origination branches, as shown by the P-values of the two-sided Spearman and Kendall tau rank correlation tests.

| Amino Acid | P(optimal, <i>de novo</i> ) | P(optimal, other) | P(t-test) | P(Spearman r) | P(Kendall tau) |
|------------|-----------------------------|-------------------|-----------|---------------|----------------|
| A          | 0.32                        | 0.45              | 9.2E-70   | 4.4E-07       | 5.3E-07        |
| C          | 0.62                        | 0.73              | 3.1E-25   | 5.9E-02       | 5.8E-02        |
| D          | 0.38                        | 0.46              | 1.3E-16   | 5.8E-01       | 5.6E-01        |
| E          | 0.50                        | 0.68              | 7.1E-95   | 6E-07         | 9.9E-07        |
| F          | 0.50                        | 0.63              | 1.6E-18   | 2.5E-03       | 2.6E-03        |
| G          | 0.28                        | 0.42              | 2.2E-59   | 2.2E-07       | 2.2E-07        |
| H          | 0.50                        | 0.60              | 5.2E-31   | 3E-04         | 3.8E-04        |
| I          | 0.33                        | 0.48              | 2.6E-22   | 1.7E-03       | 1.9E-03        |
| K          | 0.53                        | 0.71              | 1.5E-52   | 1.2E-01       | 1.2E-01        |
| L          | 0.25                        | 0.42              | 5.6E-94   | 4.5E-04       | 4.5E-04        |
| M          | 1.00                        | 1.00              | nan       | nan           | nan            |
| N          | 0.50                        | 0.55              | 5.6E-14   | 3.7E-01       | 3.9E-01        |
| P          | 0.23                        | 0.33              | 3E-40     | 2.6E-03       | 3.1E-03        |
| Q          | 0.50                        | 0.71              | 8.2E-71   | 5.9E-03       | 5.9E-03        |
| R          | 0.14                        | 0.30              | 6.8E-70   | 5E-07         | 9.7E-07        |
| S          | 0.19                        | 0.24              | 1.5E-18   | 1.8E-02       | 1.7E-02        |
| T          | 0.25                        | 0.38              | 1.8E-38   | 5E-05         | 5.7E-05        |
| V          | 0.33                        | 0.47              | 3.9E-70   | 3.2E-04       | 3.7E-04        |
| W          | 1.00                        | 1.00              | nan       | nan           | nan            |
| Y          | 0.50                        | 0.64              | 1.3E-09   | 1.5E-02       | 1.4E-02        |

Table S2. Detailed information of potentially well folded *de novo* gene candidates. Candidates with TM-score to structures in PDB smaller than 0.5 were highlighted in red. A TM-score lower than 0.5 suggests a possible novel structural fold.

| FBID               | pLDDT       | Length    | Origination lineage   | pLDDT (Anc) | TM-score (ToPDB) | Similar fold in PDB | Sequence identity | Gene           |
|--------------------|-------------|-----------|-----------------------|-------------|------------------|---------------------|-------------------|----------------|
| <b>FBgn0004593</b> | <b>0.89</b> | <b>98</b> | <b>Br<sub>7</sub></b> | <b>0.92</b> | <b>0.40</b>      | <b>4ou6A</b>        | <b>0.087</b>      | <b>Eig71Ef</b> |
| <b>FBgn0014850</b> | <b>0.92</b> | <b>98</b> | <b>Br<sub>7</sub></b> | <b>0.92</b> | <b>0.45</b>      | <b>4icgD</b>        | <b>0.053</b>      | <b>Eig71Ej</b> |
| <b>FBgn0262896</b> | <b>0.80</b> | <b>39</b> | <b>Br<sub>5</sub></b> | <b>0.70</b> | <b>0.49</b>      | <b>2h4bC</b>        | <b>0.158</b>      | <b>CG43251</b> |
| FBgn0260967        | 0.90        | 280       | Br <sub>8</sub>       | 0.91        | 0.56             | 6xgxB               | 0.075             | CG42590        |
| FBgn0265834        | 0.85        | 153       | Br <sub>4</sub>       | 0.84        | 0.68             | 1u89A               | 0.066             | CG44623        |
| FBgn0261580        | 0.88        | 137       | Br <sub>6</sub>       | 0.78        | 0.60             | 4pr9F               | 0.066             | CG42690        |
| FBgn0261587        | 0.86        | 139       | Br <sub>7</sub>       | 0.86        | 0.59             | 5fjeB               | 0.022             | CG42697        |
| FBgn0263250        | 0.87        | 127       | Br <sub>3</sub>       | 0.88        | 0.61             | 1x91A               | 0.023             | CG43393        |
| FBgn0261581        | 0.85        | 140       | Br <sub>6</sub>       | 0.78        | 0.61             | 6q6bD               | 0.028             | CG42691        |
| FBgn0262819        | 0.91        | 114       | Br <sub>6</sub>       | 0.77        | 0.62             | 5figF               | 0.062             | CG43190        |
| FBgn0265046        | 0.91        | 118       | Br <sub>6</sub>       | 0.81        | 0.64             | 5fjdB               | 0.076             | CG44163        |
| FBgn0052192        | 0.87        | 136       | Br <sub>3</sub>       | 0.86        | 0.64             | 5fjdB               | 0.074             | CG32192        |
| FBgn0037042        | 0.93        | 195       | Br <sub>8</sub>       | 0.92        | 0.65             | 7jh6B               | 0.093             | CG12984        |
| FBgn0264748        | 0.93        | 374       | Br <sub>6</sub>       | 0.90        | 0.66             | 1yrgB               | 0.096             | CG44006        |
| FBgn0264747        | 0.92        | 370       | Br <sub>6</sub>       | 0.90        | 0.66             | 1yrgB               | 0.138             | CG44005        |
| FBgn0264746        | 0.92        | 368       | Br <sub>6</sub>       | 0.90        | 0.67             | 6obnC               | 0.133             | CG44004        |
| FBgn0262480        | 0.89        | 126       | Br <sub>5</sub>       | 0.67        | 0.68             | 6q58D               | 0.064             | CG43070        |
| FBgn0262824        | 0.85        | 138       | Br <sub>6</sub>       | 0.78        | 0.70             | 1u89A               | 0.044             | CG43195        |
| FBgn0263647        | 0.92        | 122       | Br <sub>5</sub>       | 0.91        | 0.76             | 5me8A               | 0.057             | CG43638        |

Table S3. MD simulations of 19 potentially well-folded de novo gene candidates. Details of the calculation of structural similarity during MD simulations can be found in Material and Methods.

| <b>FBID</b>        | <b>Name</b> | <b>RMSD_FL</b> | <b>RMSD_CORE</b> | <b>TM-score</b> |
|--------------------|-------------|----------------|------------------|-----------------|
| <b>FBgn0037042</b> | CG12984     | 1.95           | 1.88             | 0.91            |
| <b>FBgn0264748</b> | CG44006     | 1.73           | 1.67             | 0.95            |
| <b>FBgn0264747</b> | CG44005     | 2.22           | 1.87             | 0.94            |
| <b>FBgn0014850</b> | Eig71Ej     | 4.53           | 1.90             | 0.76            |
| <b>FBgn0263647</b> | CG43638     | 1.22           | 1.18             | 0.94            |
| <b>FBgn0264746</b> | CG44004     | 2.58           | 1.74             | 0.94            |
| <b>FBgn0262819</b> | CG43190     | 2.87           | 2.08             | 0.83            |
| <b>FBgn0265046</b> | CG44163     | 1.70           | 1.27             | 0.92            |
| <b>FBgn0260967</b> | CG42590     | 1.47           | 1.47             | 0.96            |
| <b>FBgn0004593</b> | Eig71Ef     | 5.55           | 2.51             | 0.69            |
| <b>FBgn0262480</b> | CG43070     | 1.41           | 1.24             | 0.92            |
| <b>FBgn0261580</b> | CG42690     | 3.67           | 2.68             | 0.77            |
| <b>FBgn0052192</b> | CG32192     | 3.98           | 2.76             | 0.76            |
| <b>FBgn0263250</b> | CG43393     | 2.09           | 1.69             | 0.87            |
| <b>FBgn0261587</b> | CG42697     | 2.29           | 2.07             | 0.86            |
| <b>FBgn0265834</b> | CG44623     | 4.33           | 2.37             | 0.79            |
| <b>FBgn0261581</b> | CG42691     | 4.94           | 3.07             | 0.71            |
| <b>FBgn0262824</b> | CG43195     | 3.33           | 2.39             | 0.81            |
| <b>FBgn0262896</b> | CG43251     | 2.84           | 1.85             | 0.68            |

Table S4. Number of *D. melanogaster* protein-coding gene orthologs recovered by orthoMCL, Cactus aligner, and MCscanX with micro-synteny option. The number of overlaps between Cactus and orthoMCL, and MCScanX and orthoMCL are shown in parenthesis.

| <b>species</b>     | <b>orthoMCL</b> | <b>Cactus</b> | <b>MCScanX(Micro-synteny)</b> |
|--------------------|-----------------|---------------|-------------------------------|
| <b><i>Dsim</i></b> | 13486           | 13584 (10717) | 11726 (9870)                  |
| <b><i>Dsec</i></b> | 13427           | 13624 (11498) | 11688 (10582)                 |
| <b><i>Dyak</i></b> | 13229           | 13429 (10414) | 11361 (9245)                  |
| <b><i>Dere</i></b> | 13330           | 13507 (11439) | 11645 (10332)                 |
| <b><i>Dfic</i></b> | 12860           | 13257 (10868) | 11107 (9496)                  |
| <b><i>Drho</i></b> | 12963           | 13255 (10330) | 9241 (7880)                   |
| <b><i>Dele</i></b> | 12860           | 13242 (10863) | 10894 (9416)                  |
| <b><i>Deug</i></b> | 13008           | 13314 (10874) | 11187 (9656)                  |
| <b><i>Dtak</i></b> | 13124           | 13385 (11048) | 10757 (9346)                  |
| <b><i>Dbia</i></b> | 13036           | 13326 (11087) | 11163 (9670)                  |
| <b><i>Dkik</i></b> | 12539           | 12902 (10642) | 10088 (8666)                  |
| <b><i>Dana</i></b> | 12579           | 12993 (10764) | 10538 (9049)                  |
| <b><i>Dper</i></b> | 12138           | 12592 (10376) | 10023 (8427)                  |
| <b><i>Dpse</i></b> | 12174           | 12639 (10513) | 10055 (8565)                  |
| <b><i>Dmir</i></b> | 12193           | 12635 (10192) | 10144 (8250)                  |
| <b><i>Dwil</i></b> | 11795           | 12205 (9951)  | 9057 (7449)                   |
| <b><i>Sleb</i></b> | 11483           | 10401 (8502)  | 8968 (7455)                   |
| <b><i>Blat</i></b> | 9774            | 8737 (6822)   | 4861 (3778)                   |
| <b><i>Bdor</i></b> | 9684            | 8684 (5785)   | 4840 (3254)                   |
